# Supplementary material for: How aerosol size matters in aerosol optical depth (AOD) assimilation and the optimization using the Ångström exponent
Source: Copernicus journal article supplement (doi:10.5194/acp-23-1641-2023), 2023-01-27
Supplement: Supplementary file 1 [file acp-23-1641-2023-supplement.pdf]

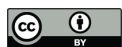

*Supplement of*

**How aerosol size matters in aerosol optical depth (AOD) assimilation and the optimization using the Ångström exponent**

**Jianbing Jin et al.**

*Correspondence to:* Bas Henzing ([bas.henzing@tno.nl](mailto:bas.henzing@tno.nl))

The copyright of individual parts of the supplement might differ from the article licence.

## 5 1 Supplementary figures

Fig. S1 presents the radius-dependent variation of the extinction efficiency  $Q_{ext}$ , total cross section per unite mass  $S$ , extinction coefficients  $\epsilon_{ext}$  as well as the interpolated Ångström exponent  $\mathcal{A}$  for sulfate aerosol (so4) at various incident bands and relative humidity. Other inorganic aerosols, e.g.,  $\text{NO}_3$  and  $\text{NH}_4$  have the very close density, hygroscopicity and refraction index. Therefore, they share the same curves to so4.

10 Fig. S2 presents the profiles of the extinction efficiency  $Q_{ext}$ , total cross section per unite mass  $S$ , extinction coefficients  $\epsilon_{ext}$  as well as the Ångström exponent  $\mathcal{A}$  for black carbon (bc) at various incident bands. Since the bc fails to absorb any water from the surround atmosphere (hygroscopicity index = 0), bc aerosols have the same optical properties in dry and wet atmosphere.

Fig. S3 presents the curves of  $Q_{ext}$ ,  $S$ ,  $\epsilon_{ext}$  as well as  $\mathcal{A}$  for organic carbon (oc). Though oc is capable of attracting moisture from the air, the hygroscopicity is very weak. Therefore, bc aerosols have very close optical properties in dry and wet  
15 atmosphere.

Fig. S4 and S5 presents the curves of  $Q_{ext}$ ,  $S$ ,  $\epsilon_{ext}$  as well as  $\mathcal{A}$  for sea salt (ss) and dust aerosols. In real situations, most of the ss and dust are in coarse-mode, therefore, they usually result in very small Ångström values.

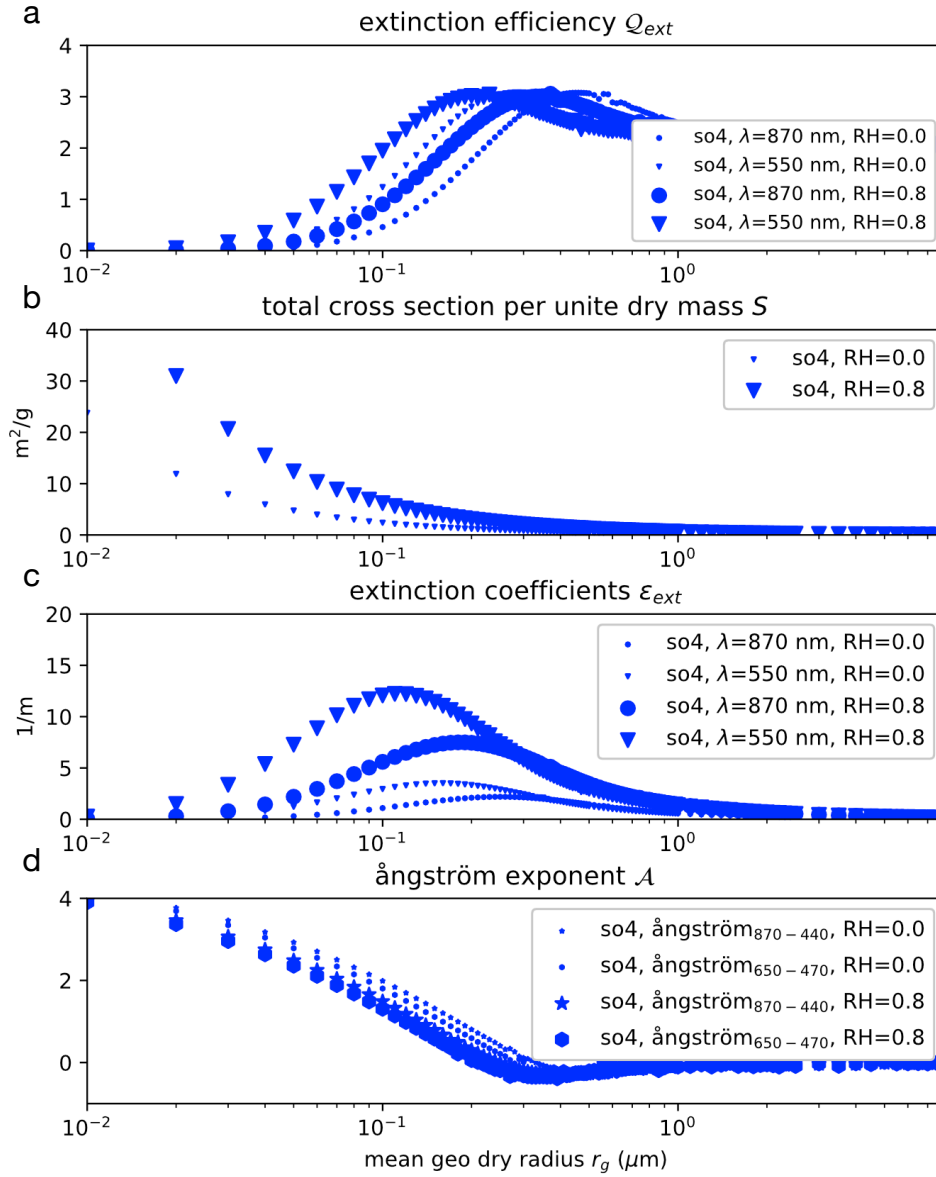

**Figure S1.** Inorganic aerosol extinction vs. mean geometric dry radius  $r_g$ . (a): extinction efficiency  $Q_{ext}$ ; (b): total cross section per unit dry mass  $S$ ; (c): extinction coefficients  $\epsilon_{ext}$ ; (d): Ångström exponent  $A$ .

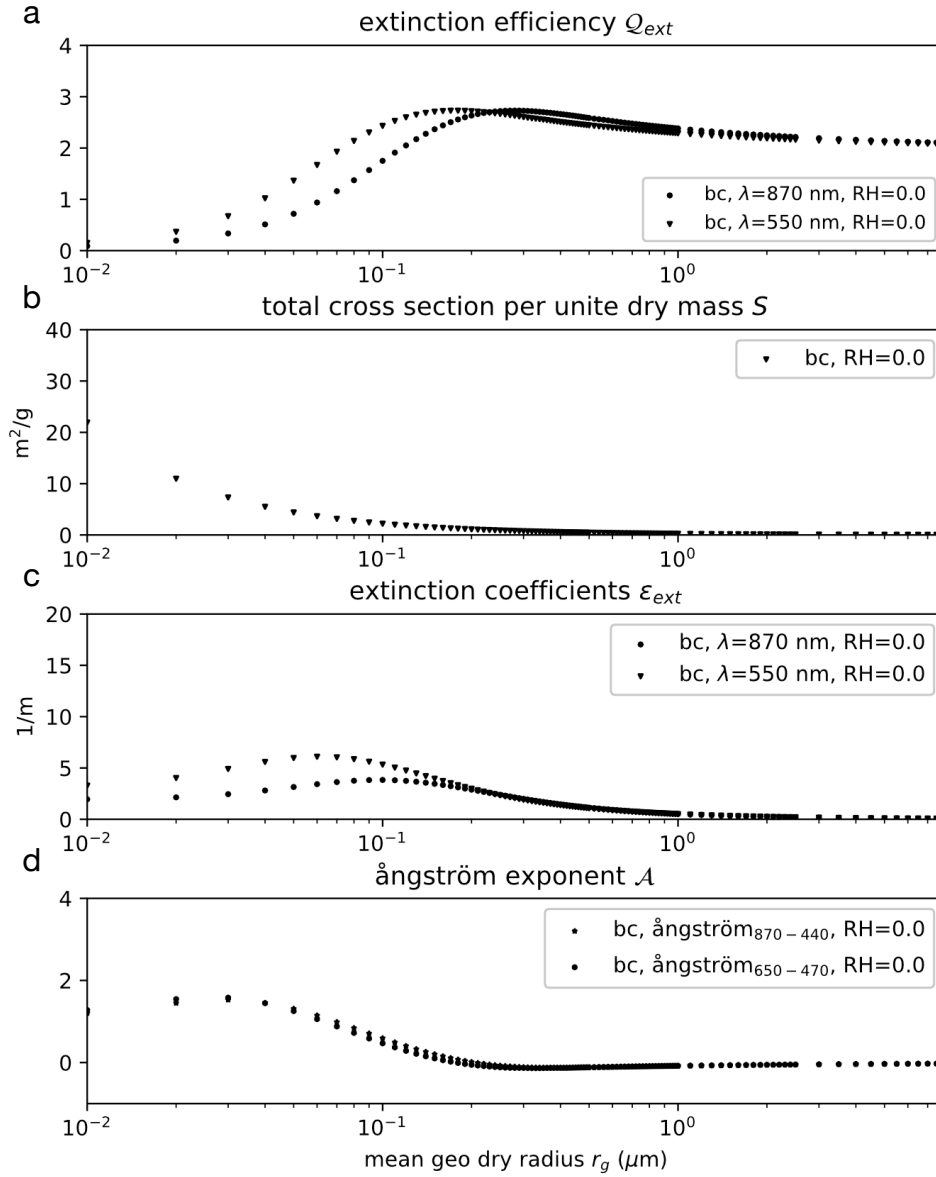

**Figure S2.** Black carbon extinction vs. mean geometric dry radius  $r_g$ . (a): extinction efficiency  $Q_{ext}$ ; (b): total cross section per unit dry mass  $S$ ; (c): extinction coefficients  $\epsilon_{ext}$ ; (d): Ångström exponent  $A$ .

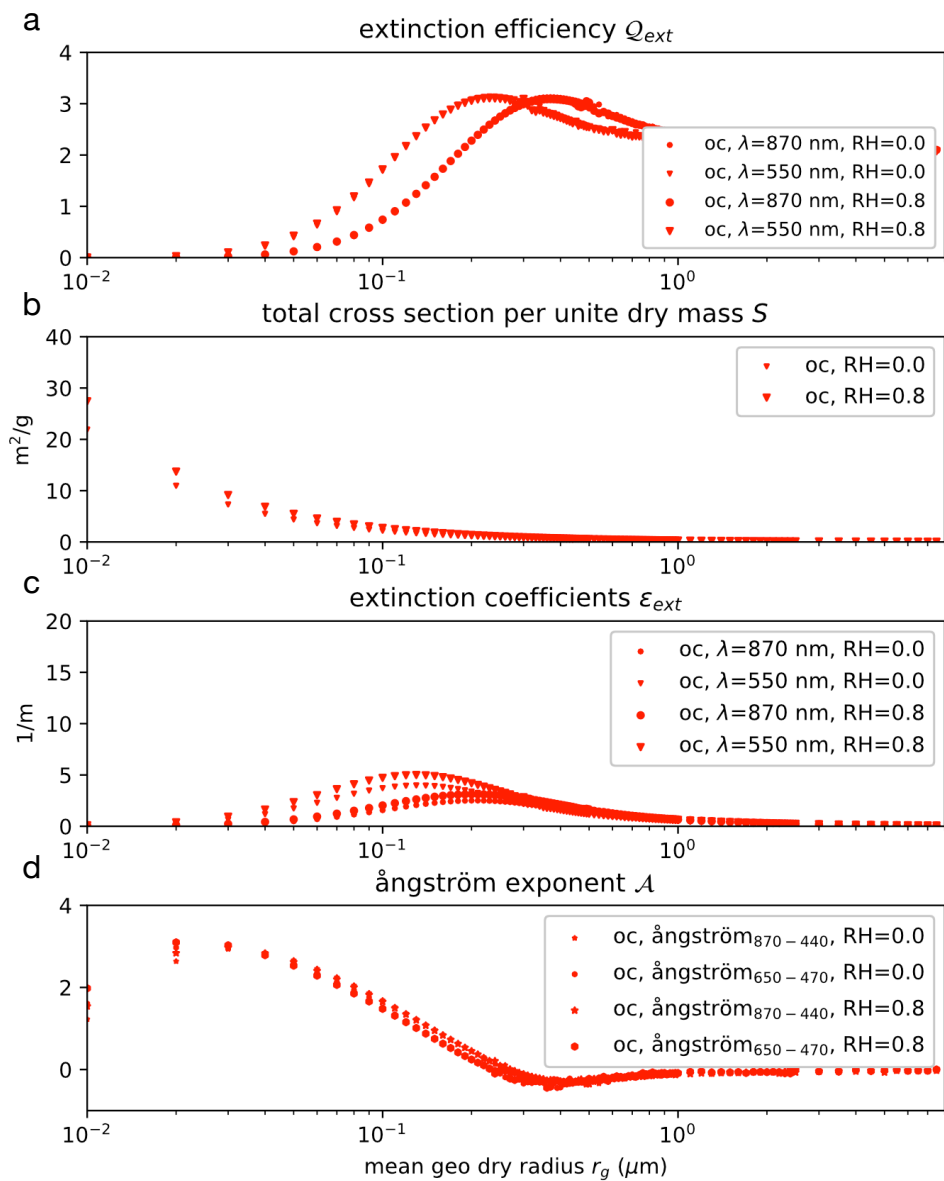

**Figure S3.** Organic carbon (oc) extinction vs. mean geometric dry radius  $r_g$ . (a): extinction efficiency  $Q_{ext}$ ; (b): total cross section per unit dry mass  $S$ ; (c): extinction coefficients  $\epsilon_{ext}$ ; (d): Ångström exponent  $A$ .

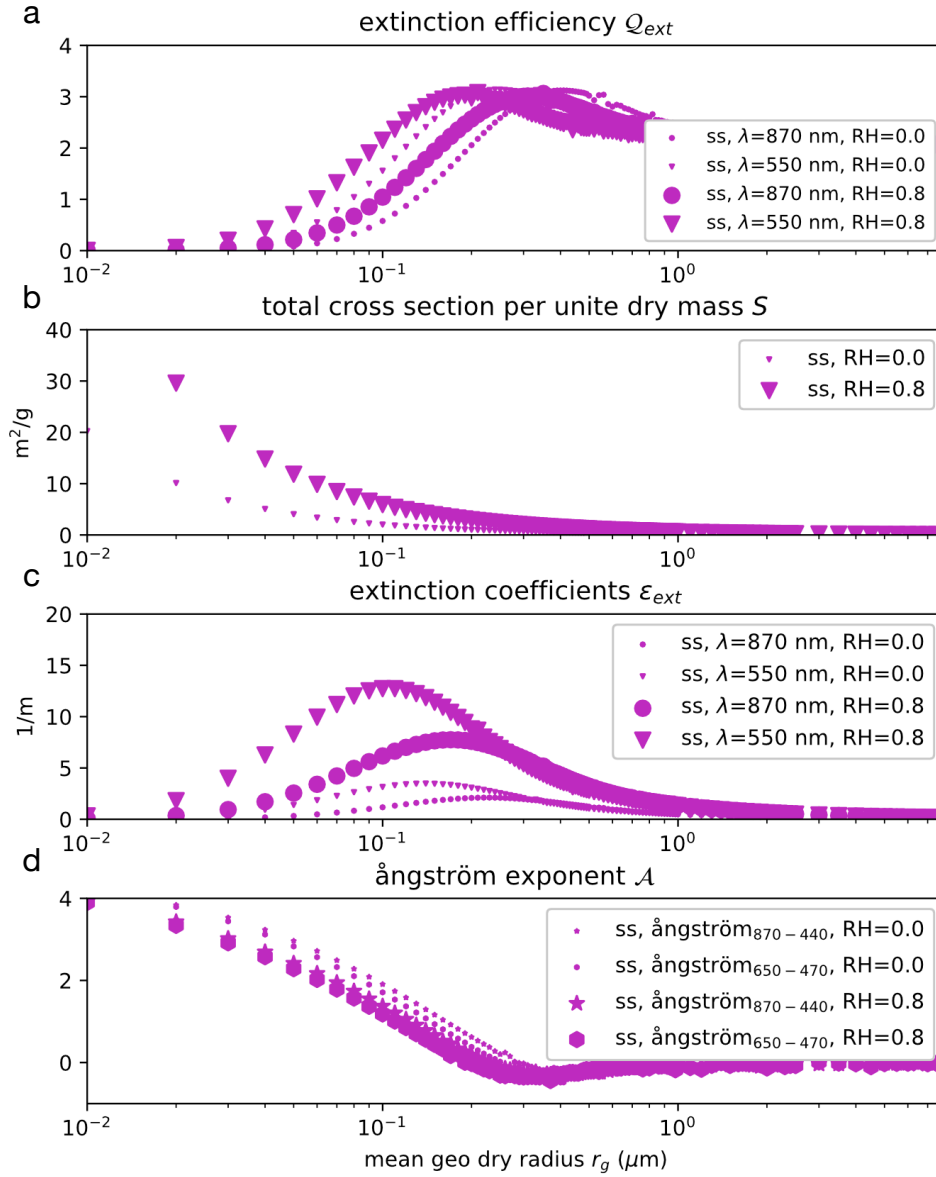

**Figure S4.** Sea salt extinction vs. mean geometric dry radius  $r_g$ . (a): extinction efficiency  $Q_{ext}$ ; (b): total cross section per unite dry mass  $S$ ; (c): extinction coefficients  $\epsilon_{ext}$ ; (d): Ångström exponent  $A$ .

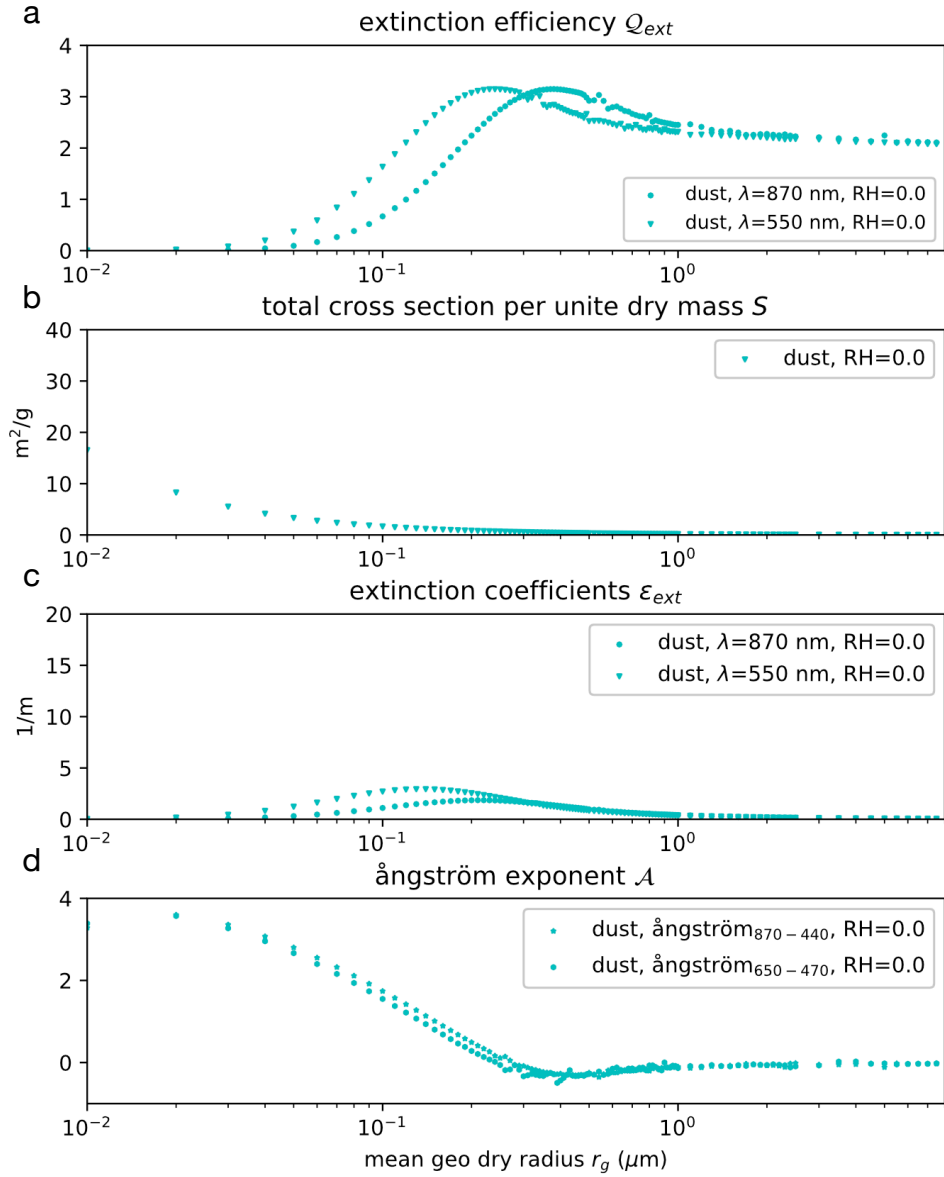

**Figure S5.** Dust extinction vs. mean geometric dry radius  $r_g$ . (a): extinction efficiency  $Q_{ext}$ ; (b): total cross section per unit dry mass  $S$ ; (c): extinction coefficients  $\epsilon_{ext}$ ; (d): Ångström exponent  $A$ .

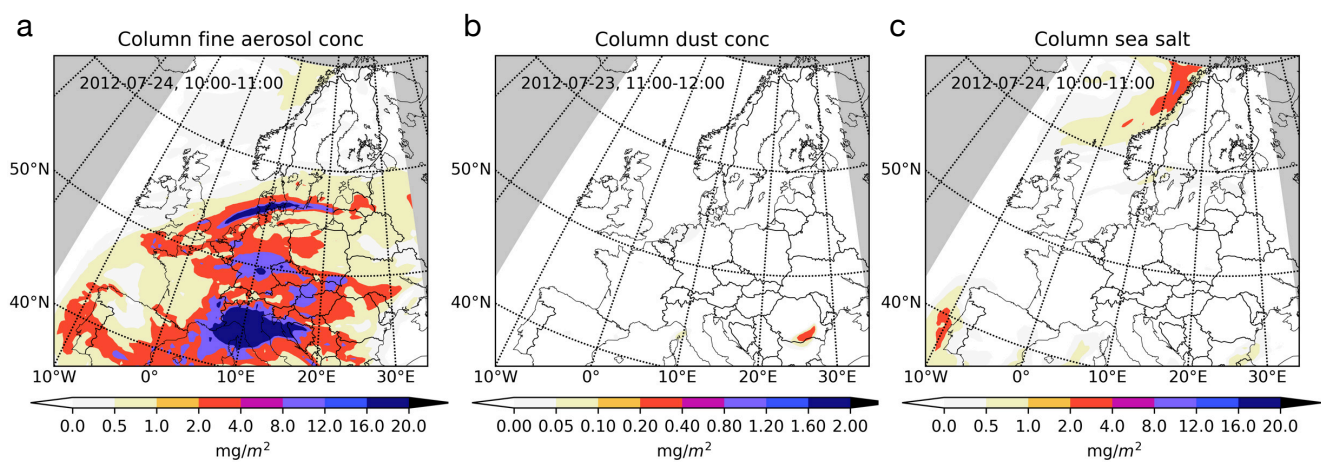

**Figure S6.** Snapshots of the LOTOS-EUROS simulated column concentration of the fine aerosol (a), dust (b) and sea salt (c) at 2012 July 24, 10:00 to 11:00.



## 2 Ångström analysis cost function minimization

The minimization of the cost function follows the 4DEnVar processes. An ensemble of aerosol radius vector are generated randomly using the prior  $\mathbf{r}_b$  and the assumed error covariance  $\mathbf{B}_r$ :

$$[\mathbf{r}_1, \dots, \mathbf{r}_N] \quad (1)$$

- 5 An ensemble of Ångström model simulations then forward with the ensemble aerosol radius vectors in parallel:

$$[\mathcal{M}(\mathbf{r}_1), \dots, \mathcal{M}(\mathbf{r}_N)] \quad (2)$$

Denote the ensemble perturbation matrix by:

$$\mathbf{L}' = \frac{1}{\sqrt{N-1}} [\mathbf{r}_1 - \bar{\mathbf{r}}, \dots, \mathbf{r}_N - \bar{\mathbf{r}}] \quad (3)$$

and mean of ensemble simulation by:

$$10 \quad \overline{\mathcal{M}(\mathbf{r})} = \frac{1}{N} \sum_{i=1}^N \mathcal{M}(\mathbf{r}_i) \quad (4)$$

where  $\bar{\mathbf{r}}$  is the mean of the ensemble aerosol radii. In the 4DEnVar assimilation algorithm, the optimal radii  $\mathbf{r}_a$  is defined as weighted sum of the columns of the perturbation matrix  $\mathbf{L}'$  using weights from a control variable vector  $\mathbf{w}$ :

$$\mathbf{r}_a = \bar{\mathbf{r}} + \mathbf{L}'\mathbf{w} \quad (5)$$

The cost function could then be reformulated as:

$$15 \quad \mathcal{J}(\mathbf{w}) = \frac{1}{2} \mathbf{w}^T \mathbf{w} + \frac{1}{2} \{ \mathbf{M}\mathbf{L}'\mathbf{w} + \overline{\mathcal{M}(\mathbf{r})} - \mathcal{A} \}^T \mathbf{R}_{\mathcal{A}}^{-1} \{ \mathbf{M}\mathbf{L}'\mathbf{w} + \overline{\mathcal{M}(\mathbf{r})} - \mathcal{A} \} \quad (6)$$

here  $\mathbf{M}$  is the linearization of the LOTOS-EUROS Ångström simulation model required for cost function minimization, and is approximated by:

$$\mathbf{M}\mathbf{L}' \approx \frac{1}{\sqrt{N-1}} [\mathcal{M}(\mathbf{r}_1) - \overline{\mathcal{M}(\mathbf{r})}, \dots, \mathcal{M}(\mathbf{r}_N) - \overline{\mathcal{M}(\mathbf{r})}] \quad (7)$$

- with the uncertainty in radii transferred into the observations space, the minimum of the cost function in Eq. 6 could then be  
20 directly calculated, and the posterior emission  $\mathbf{r}_a$  subsequently be updated.
